# Supplementary material for: Biological Control and Habitat Management for the Control of Onion Thrips, Thrips tabaci Lindeman (Thysanoptera: Thripidae), in Onion Production in Quebec, Canada
Source: MDPI journal article supplement (doi:10.3390/insects15040232), 2024-03-27
Supplement: s1 [file s1]

# Biological Control and Habitat Management for the Control of Onion Thrips, *Thrips tabaci* Lindeman (Thysanoptera: Thripidae), in Onion Production in Quebec, Canada

## Supplemental information

Supplemental Table S1. Date of sowing or transplanting of the different dry onion cultivars on the three experimental sites.

|      | AAFC site                                   | Site 1                                        | Site 2                                   |
|------|---------------------------------------------|-----------------------------------------------|------------------------------------------|
| 2021 | Trailblazer <sup>1</sup> ,<br>Sown on May 4 | Patterson <sup>2</sup> ,<br>Planted on May 26 | Cartier <sup>3</sup> ,<br>Sown on May 12 |
| 2022 | Trailblazer,<br>Sown on May 3               | Patterson,<br>Planted on May 31               | -                                        |

<sup>1</sup> Yellow onion, maturity = 94 days, high resistance to *Botrytis* spp., intermediate resistance to pink root.

<sup>2</sup> Yellow onion, maturity = 105 days, intermediate resistance to pink root.

<sup>3</sup> Yellow onion, maturity = 94 days, intermediate resistance to pink root.

Supplemental Table S2. Description of herbicide and fungicide treatments and date of application on the three experimental sites, in 2021 and 2022.

| Site      | 2021                         |          | 2022                      |           |
|-----------|------------------------------|----------|---------------------------|-----------|
|           | Treatments                   | Dates    | Treatments                | Dates     |
| AAFC site | Frontier (herbicide)         | 7 May    | Frontier (herbicide)      | 5 May     |
|           | Prowl (herbicide)            | 20 May   | Prowl (herbicide)         | 21 May    |
|           | Prowl (herbicide)            | 12 June  | Venture (herbicide)       | 4 June    |
|           | Manzate (fungicide)          | 3 July   | Prowl (herbicide)         | 11 June   |
|           | Sercadis (fungicide)         | 9 July   | Quadris (fungicide)       | 15 July   |
|           | Manzate (fungicide)          | 16 July  | Revus (fungicide)         | 16 July   |
|           | Fontelis (fungicide)         | 24 July  | Quadris (fungicide)       | 22 July   |
|           |                              |          | Ridomil gold (fungicide)  | 23 July   |
|           |                              |          | Manzate (fungicide)       | 29 July   |
|           |                              |          | Manzate (fungicide)       | 5 August  |
| Site 1    | Serenade Opti (fungicide)    | 9 August | Serenade Opti (fungicide) | 22 July   |
|           |                              |          | Copper Spray (fungicide)  | 6 August  |
|           |                              |          | Copper Spray (fungicide)  | 15 August |
| Site 2    | Venture (herbicide)          | 1 June   |                           |           |
|           | Prowl (herbicide)            | 4 June   |                           |           |
|           | Pardner (herbicide)          | 12 June  |                           |           |
|           | Manzate (fungicide)          | 17 June  |                           |           |
|           | Manzate (fungicide)          | 24 June  |                           |           |
|           | Select (herbicide)           | 28 June  |                           |           |
|           | Prowl (herbicide)            | 8 July   |                           |           |
|           | Orondis Ultra (fungicide)    | 12 July  |                           |           |
|           | Luna Tranquility (fungicide) | 21 July  |                           |           |
|           | Reason 500 SC (fungicide)    | 28 July  |                           |           |

Supplemental Table S3. Date of application and type of biological control strategy (or insecticides) applied to control *Thrips tabaci* in dry onion in 2021.

| Site      | Biological control agent                                                                 | No. of applications | Dates of application                                                                               |
|-----------|------------------------------------------------------------------------------------------|---------------------|----------------------------------------------------------------------------------------------------|
| AAFC site | <i>Stratiolaelaps scimitus</i>                                                           | 3                   | 14 June; 5, 26 July                                                                                |
|           | <i>Neoseiulus cucumeris</i> + <i>Beauveria bassiana</i>                                  | 3                   | 11 June 11; 5,26 July                                                                              |
|           | <i>Stratiolaelaps scimitus</i> + <i>Neoseiulus cucumeris</i> + <i>Beauveria bassiana</i> | 3                   | 11 June 11; 5,26 July                                                                              |
|           | Movento (spirotetramat)                                                                  | 2                   | 12, 18 June                                                                                        |
|           | Agrimek (abamectin)                                                                      | 2                   | 25 June; 2 July                                                                                    |
|           | Exirel (cyantraniliprole)                                                                | 2                   | 9, 16 July                                                                                         |
| Site 1    | <i>Stratiolaelaps scimitus</i>                                                           | 4                   | 11, 30 June; 22 July; 12 Aug.                                                                      |
|           | <i>Neoseiulus cucumeris</i> + <i>Beauveria bassiana</i>                                  | 4                   | 11, 30 June; 22 July; 12 Aug.                                                                      |
|           | <i>Stratiolaelaps scimitus</i> + <i>Neoseiulus cucumeris</i> + <i>Beauveria bassiana</i> | 4                   | 11, 30 June; 22 July; 12 Aug.                                                                      |
|           | BioCérès® ( <i>Beauveria bassiana</i> )                                                  | 6                   | 1, 13, 22, 30 July; 5, 16 Aug.                                                                     |
|           | Entrust (spinosad)                                                                       | 3                   | 1, 13, 30 July                                                                                     |
| Site 2    | <i>Stratiolaelaps scimitus</i>                                                           | 2                   | 11, 30 June                                                                                        |
|           | <i>Neoseiulus cucumeris</i> + <i>Beauveria bassiana</i>                                  | 2                   | 18 June, 9 July                                                                                    |
|           | <i>Stratiolaelaps scimitus</i> + <i>Neoseiulus cucumeris</i> + <i>Beauveria bassiana</i> | 2                   | 11, 30 June ( <i>S. scimitus</i> )<br>18 June, 9 July ( <i>N. cucumeris</i> + <i>B. bassiana</i> ) |
|           | BioCérès® ( <i>Beauveria bassiana</i> )                                                  | 3                   | 7, 28 July; 5 Aug.                                                                                 |
|           | Movento (spirotetramat)                                                                  | 1                   | 7 July                                                                                             |
|           | Agrimek (abamectin)                                                                      | 1                   | 28 July                                                                                            |
|           | Exirel (cyantraniliprole)                                                                | 1                   | 5 August                                                                                           |

Supplemental Table S4. Date of application and type of biological control strategy (or insecticides) applied to control *Thrips tabaci* in dry onion in 2022.

| Site      | Biological control agent                               | No. of applications | Dates of application                            |
|-----------|--------------------------------------------------------|---------------------|-------------------------------------------------|
| AAFC site | <i>Amblyseius swirskii</i>                             | 2                   | 24, 30 June                                     |
|           | BioTitan® ( <i>Beauveria bassiana</i> )                | 2                   | 25 June, 13 July                                |
|           | <i>Amblyseius swirskii</i> + <i>Beauveria bassiana</i> | 2                   | 24, 30 June                                     |
|           | Surround®                                              | 7                   | 14, 25 June; 1, 6, 13, 22, 29 July              |
|           | SuffOil-X®                                             | 7                   | 14, 25 June; 1, 6, 13, 22, 29 July              |
| Site 1    | <i>Amblyseius swirskii</i>                             | 8                   | 24, 30 June; 14, 22, 28 July; 4, 11, 18 Aug.    |
|           | BioTitan® ( <i>Beauveria bassiana</i> )                | 6                   | 28 June; 6, 13, 19, 29 July; 5 Aug.             |
|           | <i>Amblyseius swirskii</i> + <i>Beauveria bassiana</i> | 8                   | 24, 30 June; 14, 22, 28 July; 4, 11, 18 Aug.    |
|           | Surround®                                              | 9                   | 28 June; 6, 13, 20, 27 July; 3, 11, 17, 25 Aug. |
|           | SuffOil-X®                                             | 9                   | 28 June; 6, 13, 20, 27 July; 3, 11, 17, 25 Aug. |

Supplemental Table S5. Grades of onions in 2021 on the different experimental sites.

| Site     | Habitat manipulation | Biological control agent                              | > 7.62 cm | 6.99–7.62 cm | 6.36–6.98 cm | 5.72–6.35 cm | 5.08–5.71 cm | Downgraded (<5.08 cm) |
|----------|----------------------|-------------------------------------------------------|-----------|--------------|--------------|--------------|--------------|-----------------------|
| AFC site | Bare ground          | <i>N. cucumeris</i> + <i>B. bassiana</i>              | 0.31a*    | 7.36a        | 22.75ab      | 32.52a       | 16.48a       | 20.59b                |
|          |                      | <i>S. scimitus</i>                                    | 0.00a     | 1.09a        | 19.15a       | 41.46a       | 18.28a       | 14.56ab               |
|          |                      | <i>S. sc</i> + <i>N. cu</i> + <i>B. ba</i>            | 0.67a     | 7.27a        | 21.35a       | 28.24a       | 21.75a       | 20.73b                |
|          |                      | insecticides                                          | 0.58a     | 11.37a       | 34.66b       | 33.82a       | 12.69a       | 6.89a                 |
|          | Straw mulch          | <i>N. cucumeris</i> + <i>B. bassiana</i>              | 0.58a     | 9.49a        | 32.86a       | 30.73a       | 15.05a       | 11.29a                |
|          |                      | <i>S. scimitus</i>                                    | 1.14a     | 11.62a       | 34.51a       | 32.19a       | 12.47a       | 8.07a                 |
|          |                      | <i>S. sc</i> + <i>N. cu</i> + <i>B. ba</i>            | 0.28a     | 7.59a        | 32.86a       | 35.21a       | 16.41a       | 12.33a                |
|          |                      | insecticides                                          | 1.30a     | 13.34a       | 40.16a       | 30.55a       | 9.93a        | 4.73a                 |
|          | Flower strip         | <i>N. cucumeris</i> + <i>B. bassiana</i>              | 0.00a     | 6.55a        | 29.98a       | 23.25a       | 27.25a       | 12.97a                |
|          |                      | <i>S. scimitus</i>                                    | 0.54a     | 10.01a       | 34.11a       | 25.68a       | 19.06a       | 10.59a                |
|          |                      | <i>S. sc</i> + <i>N. cu</i> + <i>B. ba</i>            | 0.28a     | 5.95a        | 34.31a       | 37.32a       | 14.31a       | 7.84a                 |
|          |                      | Insecticides                                          | 0.79a     | 7.07a        | 39.57a       | 31.90a       | 11.94a       | 8.71a                 |
| Site 1   | Bare ground          | Untreated control                                     | 0.00a     | 2.09a        | 17.09a       | 33.99a       | 26.32a       | 19.82a                |
|          |                      | <i>N. cucumeris</i> + <i>B. bassiana</i>              | 0.00a     | 2.22a        | 12.99a       | 38.66a       | 30.41a       | 14.66a                |
|          |                      | <i>N. cucumeris</i> + <i>S. scimitus</i>              | 0.40a     | 2.30a        | 12.14a       | 31.55a       | 31.50a       | 20.90a                |
|          |                      | <i>N. cucumeris</i> + <i>B. bassi</i> + <i>S. sci</i> | 0.00a     | 3.02a        | 24.15a       | 29.51a       | 24.54a       | 17.62a                |
|          |                      | <i>B. bassiana</i>                                    | 0.37a     | 4.33a        | 9.90a        | 27.94a       | 22.92a       | 34.16a                |
|          |                      | Insecticides                                          | 0.00a     | 5.69a        | 20.41a       | 32.57a       | 26.05a       | 13.45a                |
| Site 2   | Bare ground          | Untreated control                                     | 0.17a     | 1.18a        | 10.13a       | 33.96a       | 29.23a       | 24.62a                |
|          |                      | <i>N. cucumeris</i> + <i>B. bassiana</i>              | 0.00a     | 0.57a        | 12.66a       | 31.40a       | 32.25a       | 22.73a                |
|          |                      | <i>N. cucumeris</i> + <i>S. scimitus</i>              | 0.18a     | 1.82a        | 13.48a       | 32.52a       | 25.86a       | 24.88a                |
|          |                      | <i>N. cucumeris</i> + <i>B. bassi</i> + <i>S. sci</i> | 0.00a     | 1.51a        | 9.87a        | 36.73a       | 27.06a       | 23.37a                |
|          |                      | <i>B. bassiana</i>                                    | 0.00a     | 0.78a        | 9.53a        | 34.79a       | 32.13a       | 21.08a                |
|          |                      | Insecticides                                          | 0.00a     | 0.73a        | 12.23a       | 33.65a       | 31.30a       | 21.05a                |

\*Statistical comparisons were conducted between each of the treatments for the same onion grade. Different letters indicate values that are significantly different according to ANOVA followed by a Tukey test ( $p < 0.05$ ).

Supplemental Table S6. Grades of onions in 2022 on the different experimental sites.

| Site      | Treatments                           | > 7.62 cm | 6.99–7.62 cm | 6.36–6.98 cm | 5.72–6.35 cm | 5.08–5.71 cm | Downgraded (<5.08 cm) |
|-----------|--------------------------------------|-----------|--------------|--------------|--------------|--------------|-----------------------|
| AAFC Site | Mulch                                | 1.51b     | 12.59bc      | 33.56a       | 24.95a       | 12.68bc      | 14.71bcd              |
|           | Net                                  | 0.38b     | 0.82c        | 11.36c       | 25.71a       | 35.26a       | 26.48a                |
|           | <i>B. bassiana</i>                   | 3.42b     | 6.13bc       | 16.79bc      | 24.56a       | 24.41ab      | 24.68ab               |
|           | <i>A. swirskii</i>                   | 21.87a    | 28.66a       | 19.22bc      | 12.27a       | 6.47c        | 11.49d                |
|           | <i>A. swirskii</i> + <i>B. bassi</i> | 6.01b     | 20.30ab      | 27.30ab      | 22.81a       | 12.12bc      | 11.46d                |
|           | Kaolin                               | 3.62b     | 13.00abc     | 23.75abc     | 25.81a       | 12.84bc      | 20.98abcd             |
|           | Mineral oil                          | 6.32b     | 18.72ab      | 22.32abc     | 22.49a       | 17.45bc      | 12.71cd               |
|           | Untreated control                    | 2.35b     | 8.20bc       | 23.82abc     | 21.06a       | 20.83b       | 23.74abc              |
| Site 1    | Mulch                                | 0.19b     | 1.13b        | 13.03abc     | 27.79a       | 22.76a       | 33.88bc               |
|           | Net                                  | 0.00b     | 0.00b        | 0.19c        | 4.39b        | 16.69a       | 78.35a                |
|           | <i>B. bassiana</i>                   | 0.65ab    | 3.83b        | 14.81abc     | 27.21a       | 21.49a       | 30.47bc               |
|           | <i>A. swirskii</i>                   | 3.17a     | 11.71a       | 26.39a       | 29.81a       | 12.82a       | 13.52c                |
|           | <i>A. swirskii</i> + <i>B. bassi</i> | 1.91ab    | 3.70b        | 21.89ab      | 29.27a       | 21.00a       | 18.69bc               |
|           | Kaolin                               | 0.19b     | 1.60b        | 8.53bc       | 21.81a       | 22.69a       | 38.83bc               |
|           | Mineral oil                          | 0.65ab    | 4.59b        | 18.21ab      | 33.05a       | 24.64a       | 16.18bc               |
|           | Untreated control                    | 0.00b     | 1.10b        | 7.46bc       | 20.56ab      | 25.05a       | 44.45b                |

\*Statistical comparisons were conducted between each of the treatments for the same onion grade. Different letters indicate values that are significantly different according to ANOVA followed by a Tukey test ( $p < 0.05$ ).

Supplemental Table S7. Total abundance of predators observed on onions during the monitoring period, for the entire season.

| Year | Site   | Treatment                                                     | Total number of predators* | Total number of predator per site |
|------|--------|---------------------------------------------------------------|----------------------------|-----------------------------------|
| 2021 | Site 1 | Insecticide                                                   | 4                          | 82                                |
|      |        | No insecticide                                                | 17                         |                                   |
|      |        | <i>N. cucumeris</i> + <i>B. bassiana</i>                      | 14                         |                                   |
|      |        | <i>N. cucumeris</i> + <i>S. scimitus</i>                      | 20                         |                                   |
|      |        | <i>B. bassiana</i>                                            | 14                         |                                   |
|      |        | <i>S. scimitus</i> + <i>N. cucumeris</i> + <i>B. bassiana</i> | 13                         |                                   |
|      | Site 2 | Insecticide                                                   | 8                          | 53                                |
|      |        | No insecticide                                                | 10                         |                                   |
|      |        | <i>N. cucumeris</i> + <i>B. bassiana</i>                      | 11                         |                                   |
|      |        | <i>N. cucumeris</i> + <i>S. scimitus</i>                      | 15                         |                                   |
|      |        | <i>B. bassiana</i>                                            | 4                          |                                   |
|      |        | <i>S. scimitus</i> + <i>N. cucumeris</i> + <i>B. bassiana</i> | 5                          |                                   |
|      | AAFC   | Bare ground                                                   | 5                          | 17                                |
|      |        | Mulch                                                         | 9                          |                                   |
|      |        | Flowers                                                       | 3                          |                                   |
| 2022 | Site 1 | No insecticide                                                | 77                         | 427                               |
|      |        | Mulch                                                         | 79                         |                                   |
|      |        | Kaolin                                                        | 23                         |                                   |
|      |        | Mineral oil                                                   | 56                         |                                   |
|      |        | <i>A. swirskii</i>                                            | 61                         |                                   |
|      |        | <i>B. bassiana</i>                                            | 64                         |                                   |
|      | AAFC   | <i>A. swirskii</i> + <i>B. bassiana</i>                       | 67                         | 44                                |
|      |        | No insecticide                                                | 8                          |                                   |
|      |        | Mulch                                                         | 3                          |                                   |
|      |        | Mulch+flowers                                                 | 8                          |                                   |
|      |        | Flowers                                                       | 4                          |                                   |
|      |        | Kaolin                                                        | 7                          |                                   |
|      |        | Mineral oil                                                   | 1                          |                                   |
|      |        | <i>A. swirskii</i>                                            | 2                          |                                   |
|      |        | <i>B. bassiana</i>                                            | 8                          |                                   |
|      |        | <i>A. swirskii</i> + <i>B. bassiana</i>                       | 3                          |                                   |

\*Predators included Coccinellidae, Syrphidae, Aeolothripidae and Chrysopidae.

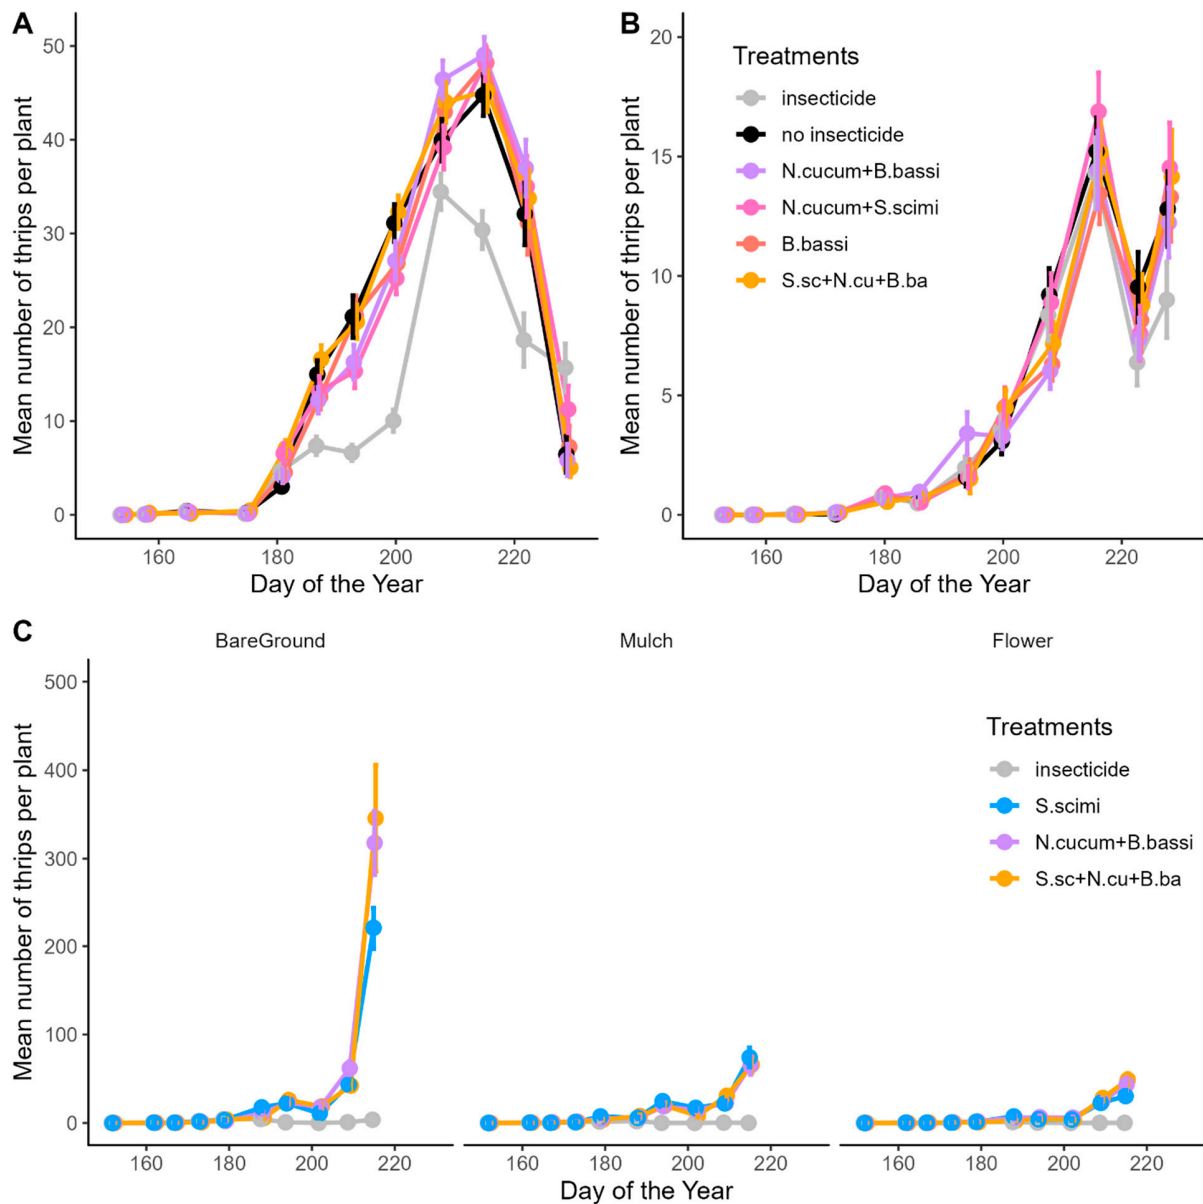

Supplemental Figure S1. Seasonal variation in the mean number of *Thrips tabaci* per plant ( $\pm$ SE) in onion fields in 2021 at A) Site 1; B) Site 2 and C) AAFC site.



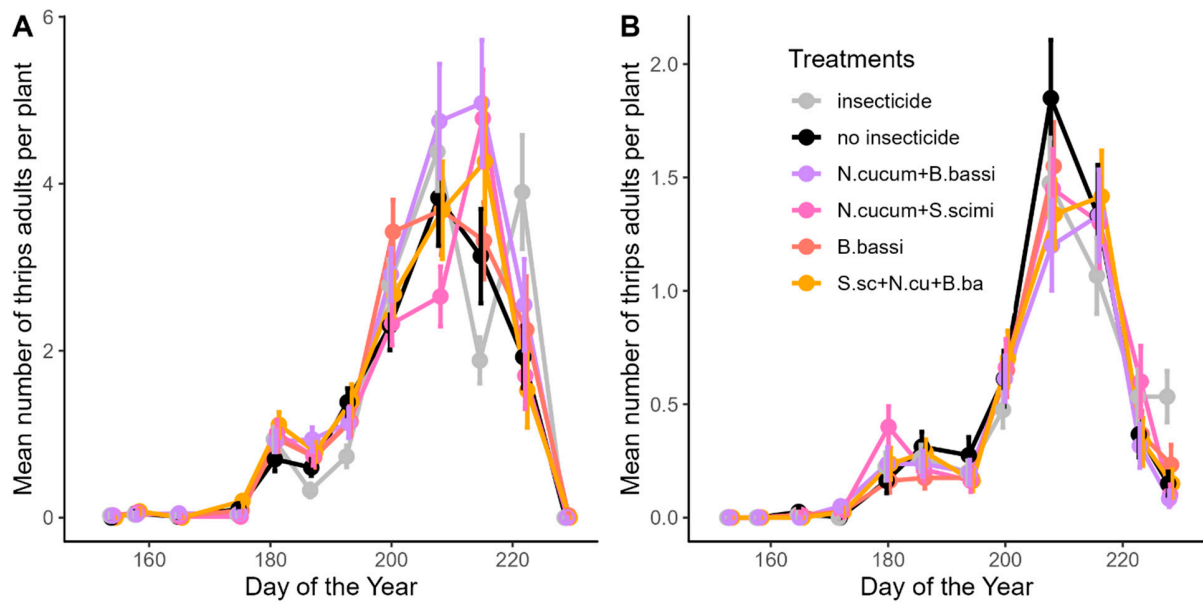

Supplemental Figure S2. Seasonal variation in the mean number of *Thrips tabaci* adults per plant ( $\pm$ SE) in onion fields in 2021 at A) Site 1 and B) Site 2 (data not available on Site AAFC).

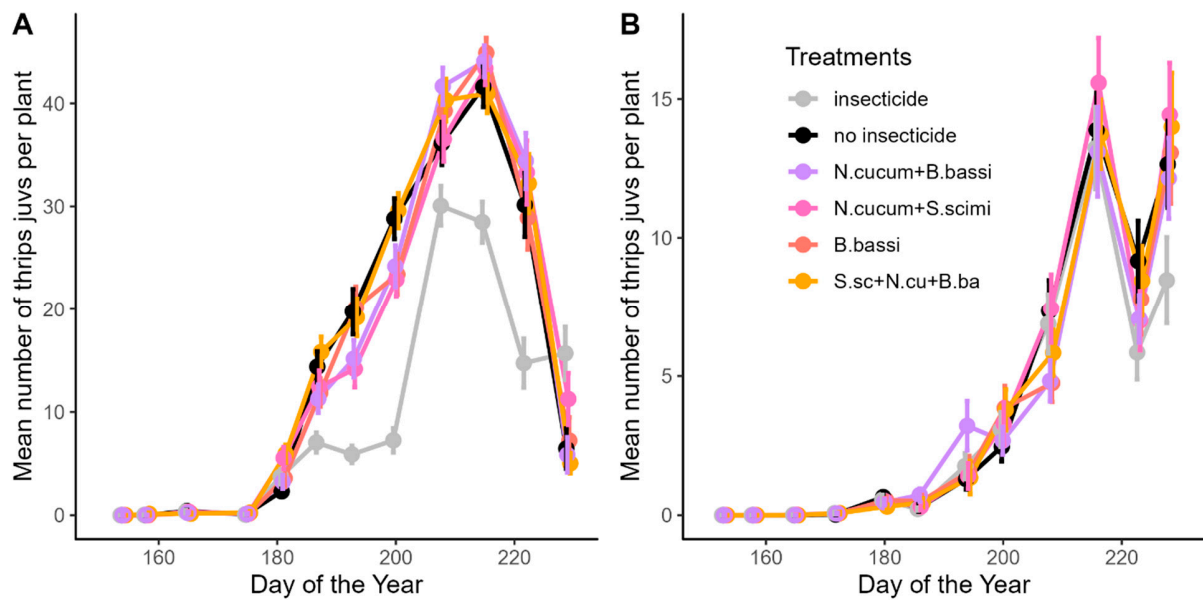

Supplemental Figure S3. Seasonal variation in the mean number of *Thrips tabaci* juveniles per plant ( $\pm$ SE) in onion fields in 2021 at A) Site 1 and B) Site 2 (data not available on Site AAFC).

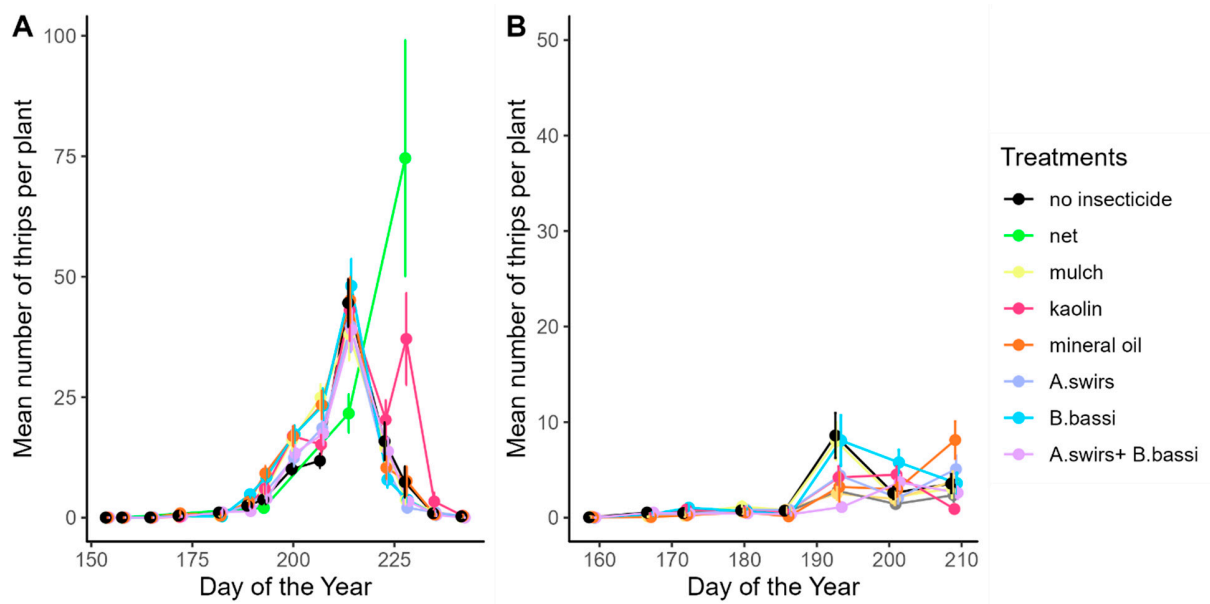

Supplemental Figure S4. Seasonal variation of the mean number of *Thrips tabaci* per leaf ( $\pm$ SE) in onion fields in 2022 at A) Site 1; B) AAFC site.

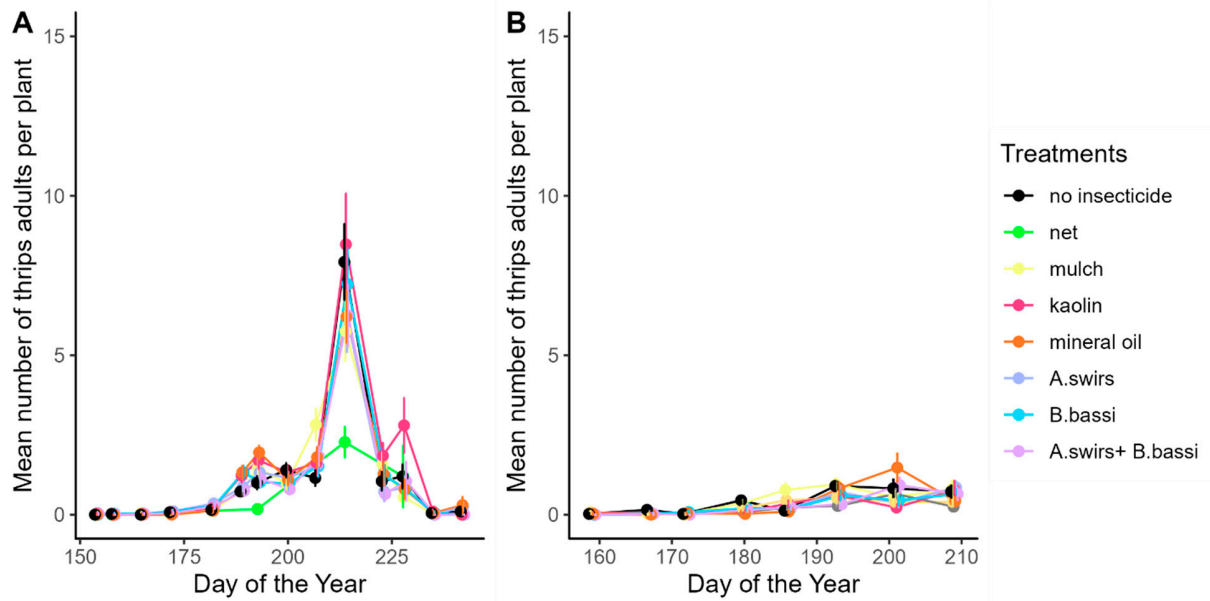

Supplemental Figure S5. Seasonal variation in the mean number of *Thrips tabaci* adults per plant ( $\pm$ SE) in onion fields in 2022 at A) Site 1 and B) AAFC Site.

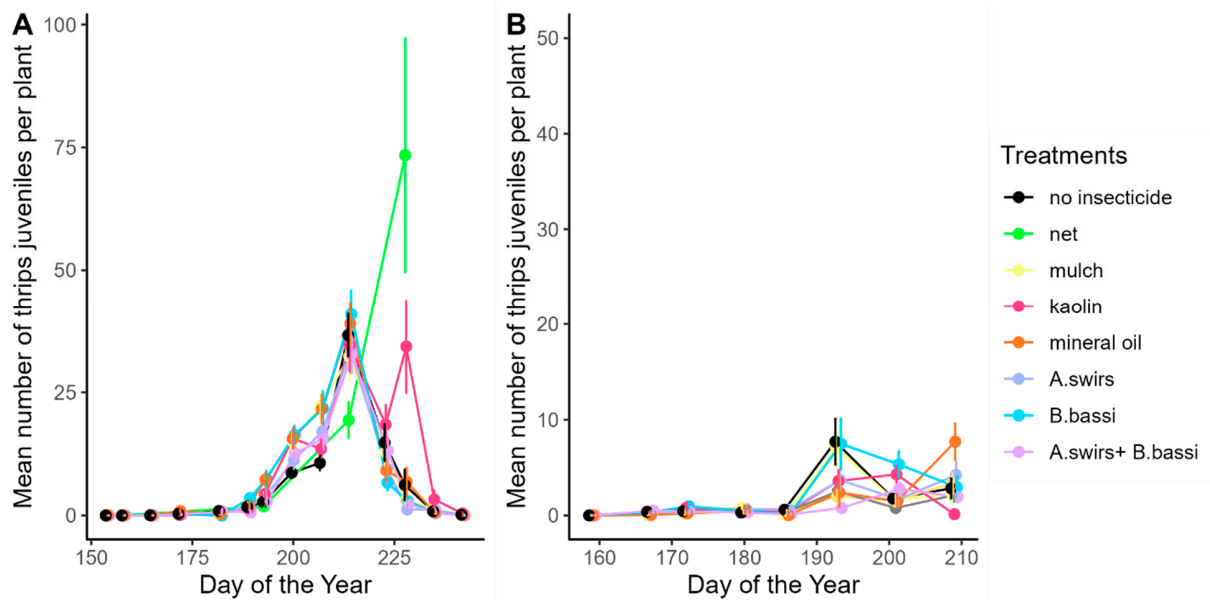

Supplemental Figure S6. Seasonal variation in the mean number of *Thrips tabaci* juveniles per plant ( $\pm$ SE) in onion fields in 2022 at A) Site 1 and B) AAFC Site.

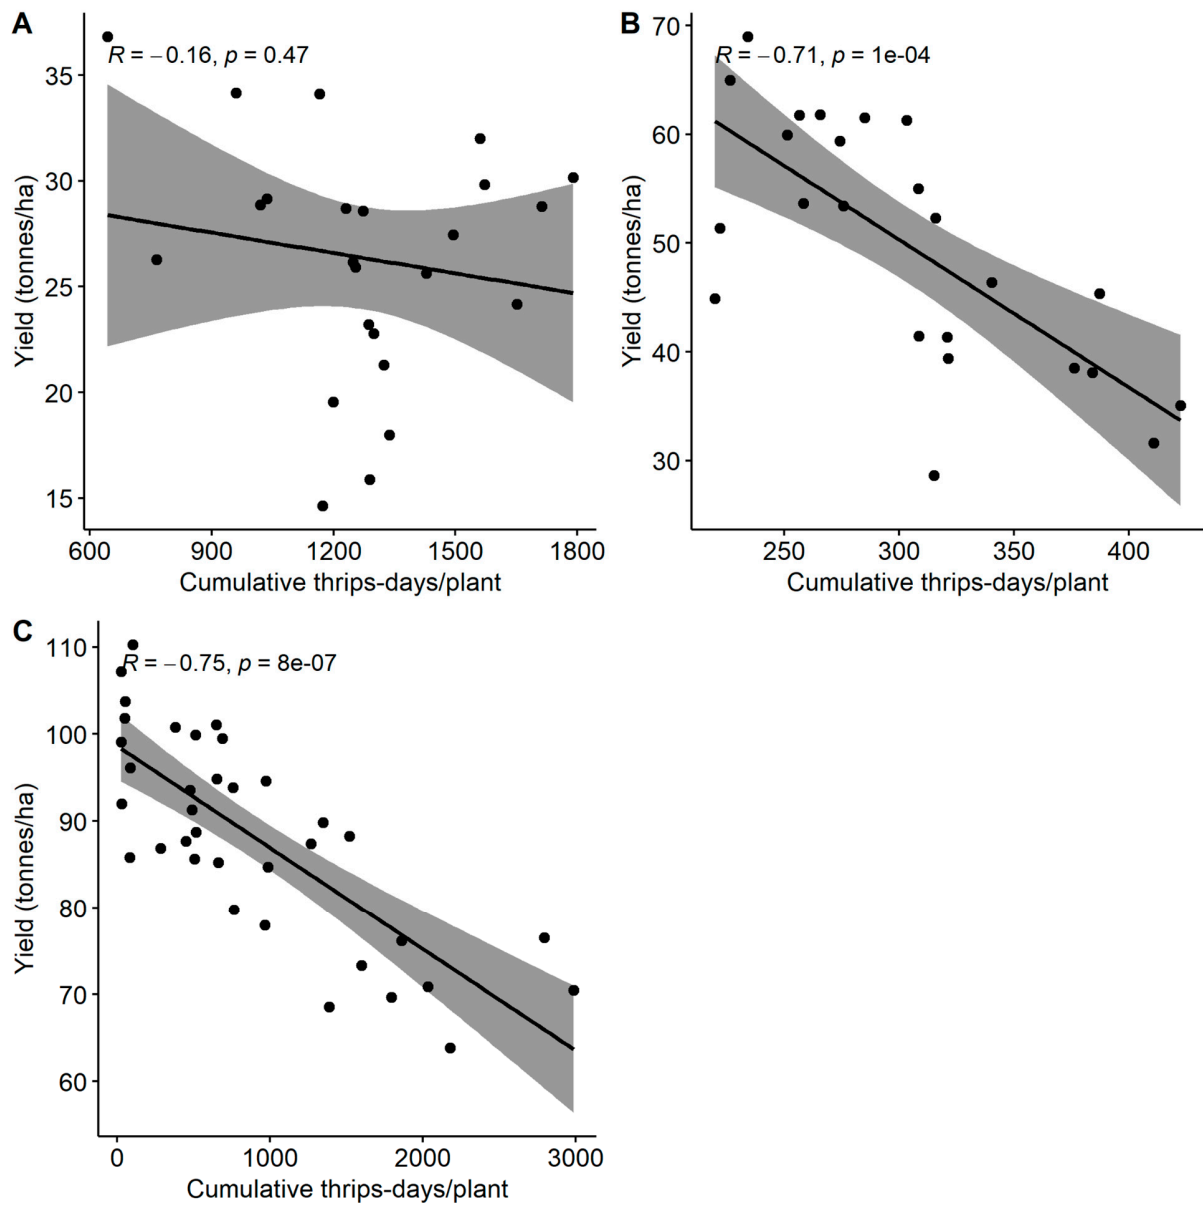

Supplemental Figure S7. Correlation between cumulative thrips-days and onion yield 2021 for all sites.

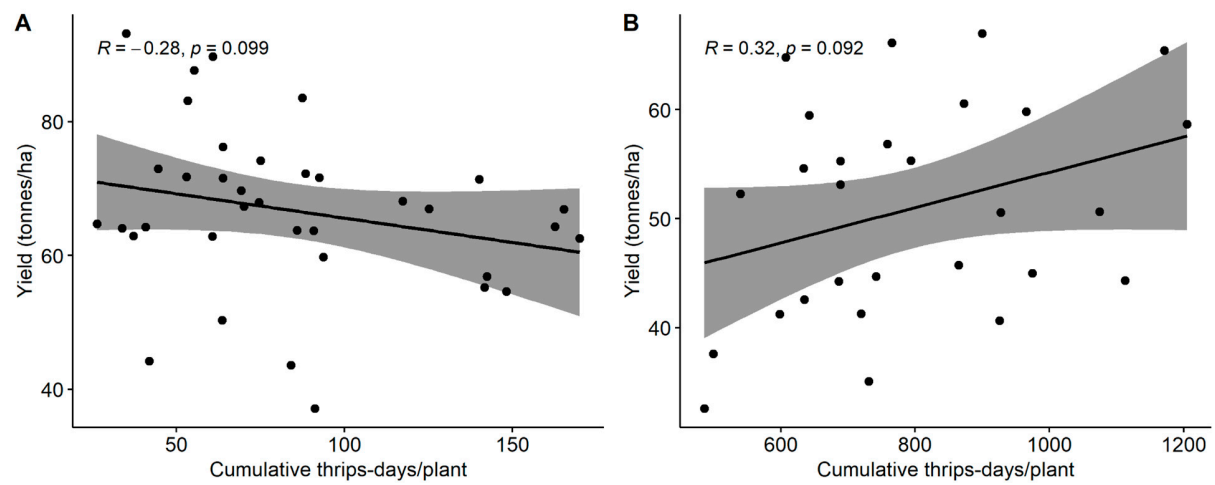

Supplemental Figure S8. Correlation between cumulative thrips-days and onion yield 2022 from all sites.

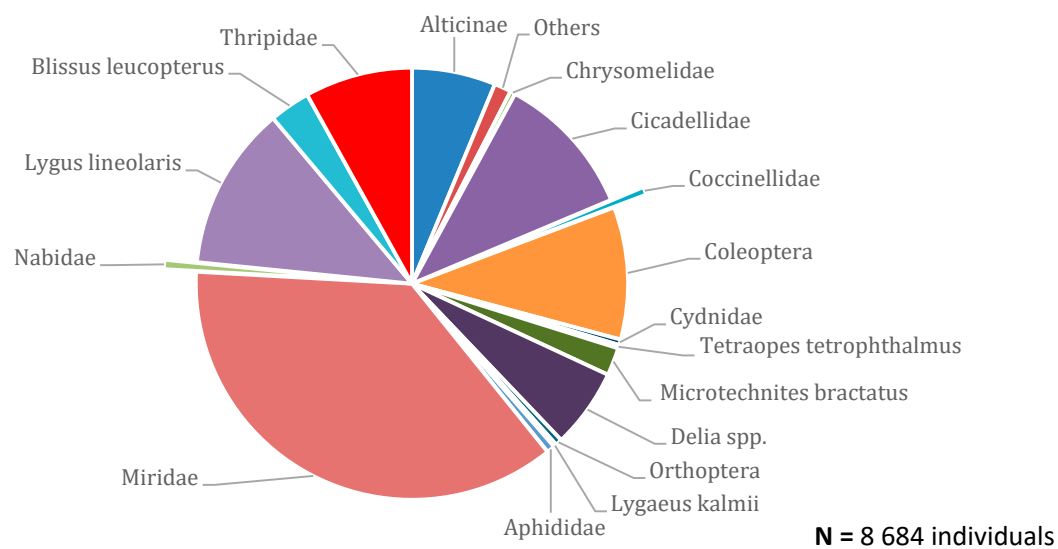

Supplemental Figure S9. Relative abundance of insect biodiversity sampled by sweep net in flower strips during the 2021 season.
